# Supplementary material
Source: publisher site journal article supplement (https://www.dovepress.com/article/550628)
Supplement: Supplementary file 1 [file R05Supp_TableV2.docx]

Table S1 Descriptive and Comparative Statistics by Follow-up Completion

|  | Completed 3-Month Follow-Up | | | |  |  |
| --- | --- | --- | --- | --- | --- | --- |
|  | Yes  (n=175) | | No  (n=117) | |  |  |
|  | *n* | *%* | *n* | *%* | *χ2* | *p* |
| Diagnostic Group |  |  |  |  |  |  |
| Fibromyalgia | 45 | 25.7 | 29 | 24.8 | 0.32 | .858 |
| Non- Fibromyalgia | 130 | 74.3 | 88 | 75.2 |  |  |
| Spondylosis | 42 | 24.0 | 23 | 19.7 |  |  |
| Neuralgia | 38 | 21.7 | 25 | 21.4 |  |  |
| Myofascial Pain | 13 | 7.4 | 4 | 3.4 |  |  |
| Back Pain | 10 | 5.7 | 11 | 9.4 |  |  |
| Arthritis | 6 | 3.4 | 4 | 3.4 |  |  |
| Others | 21 | 12.0 | 21 | 17.9 |  |  |
| Age Group |  |  |  |  |  |  |
| Younger Age (~49) | 39 | 22.3 | 28 | 23.9 | 2.66 | .264 |
| Middle Age (50-64) | 62 | 35.4 | 31 | 26.5 |  |  |
| Old Age (65~) | 74 | 42.3 | 58 | 49.6 |  |  |
| Sex |  |  |  |  |  |  |
| Male | 66 | 37.7 | 45 | 38.5 | 0.02 | .897 |
| Female | 109 | 62.3 | 72 | 61.5 |  |  |
| Education |  |  |  |  |  |  |
| Senior High Or Less | 82 | 46.9 | 59 | 50.4 | 0.36 | .550 |
| College or Above | 93 | 53.1 | 58 | 49.6 |  |  |
| Marriage |  |  |  |  |  |  |
| Single | 33 | 18.9 | 23 | 19.7 | 0.30 | .985 |
| Married | 109 | 62.3 | 72 | 61.5 |  |  |
| Divorced/Widowed | 33 | 18.9 | 22 | 18.8 |  |  |
| Living Status |  |  |  |  |  |  |
| Alone | 25 | 14.3 | 16 | 13.7 | 1.29 | .524 |
| With 1~2 | 101 | 57.7 | 61 | 52.1 |  |  |
| With 3 or more | 49 | 28.0 | 40 | 34.2 |  |  |
| Employment |  |  |  |  |  |  |
| Not Employed | 23 | 13.1 | 28 | 23.9 | 6.73 | .081 |
| Full Time | 62 | 35.4 | 34 | 29.1 |  |  |
| Part Time | 17 | 9.7 | 7 | 6.0 |  |  |
| Retired | 73 | 41.7 | 48 | 41.0 |  |  |
|  | *Mean* | *SD* | *Mean* | *SD* | *t* | *p* |
| Age | 60.42 | 13.73 | 61.30 | 16.79 | -0.48 | .637 |
| Pain Duration (month) | 96.73 | 109.93 | 84.07 | 106.64 | 0.98 | .330 |
| Pain Intensity | 6.00 | 2.64 | 6.01 | 2.57 | -0.03 | .978 |
| UCLA-3 Loneliness | 6.26 | 3.00 | 5.84 | 2.39 | 1.32 | .187 |

Table S2 Standardized parameter estimates of the cross-lagged path analyses

|  |  | **All**  **Participants** | | | **Diagnostic Groups** | | | | | |
| --- | --- | --- | --- | --- | --- | --- | --- | --- | --- | --- |
|  |  | **Fibromyalgia** | | | **Non-Fibromyalgia** | | |
| T0 | 🡪T1 | *β* | [95% CI] | *p* | *β* | [95% CI] | *p* | *β* | [95% CI] | *p* |
| Pain | 🡪Pain | 0.49 | [ 0.36, 0.60] | .001 | 0.50 | [ 0.16, 0.73] | .010 | 0.49 | [ 0.34, 0.62] | .001 |
| Loneliness | 🡪Loneliness | 0.77 | [ 0.69, 0.83] | .001 | 0.72 | [ 0.48, 0.87] | .001 | 0.78 | [ 0.69, 0.85] | .001 |
| Pain | 🡪Loneliness | -0.10 | [-0.21,-0.02] | .017 | -0.17 | [-0.42, 0.07] | .172 | -0.08 | [-0.19, 0.01] | .081 |
| Loneliness | 🡪Pain | 0.20 | [ 0.07, 0.32] | .002 | 0.03 | [-0.25, 0.29] | .840 | 0.26 | [ 0.12, 0.39] | .001 |
|  |  | **Age Groups** | | | | | | | | |
|  | | **Younger age (~49)** | | | **Middle age (50~64)** | | | **Old age (65~)** | | |
| T0 | 🡪T1 | *β* | [95% CI] | *p* | *β* | [95% CI] | *p* | *β* | [95% CI] | *p* |
| Pain | 🡪Pain | 0.72 | [ 0.52, 0.87] | .002 | 0.42 | [ 0.15, 0.63] | .003 | 0.44 | [ 0.23, 0.62] | .002 |
| Loneliness | 🡪Loneliness | 0.71 | [ 0.43, 0.87] | .003 | 0.72 | [ 0.56, 0.84] | .002 | 0.80 | [ 0.65, 0.90] | .001 |
| Pain | 🡪Loneliness | -0.07 | [-0.29, 0.13] | .462 | -0.04 | [-0.23, 0.12] | .639 | -0.15 | [-0.28, -0.01] | .035 |
| Loneliness | 🡪Pain | 0.12 | [-0.12, 0.31] | .302 | 0.20 | [ 0.04, 0.36] | .019 | 0.14 | [-0.11, 0.35] | .227 |
